# 1 Suitable habitats of fish species in 2 the Barents Sea

3 Bérengère Husson<sup>1</sup>, Gregoire Certain<sup>2</sup>, Anatoly Filin<sup>3</sup>, Benjamin Planque<sup>1</sup>

4 <sup>1</sup> Institute of Marine Research, Hjalmar Johannesen 14, 9007 Tromsø, Norway

5 <sup>2</sup> Laboratoire Halieutique Méditerranéenne, RBE-MARBEC, Ifremer, Avenue Jean  
6 Monnet, 34203 Sète, France

7 <sup>3</sup> Polar Branch of the Federal State Budget Scientific Institution, Russian Federal  
8 Research Institute of Fisheries and Oceanography ("PINRO" named after  
9 N.M.Knipovich), Akademik Knipovich Street 6, Murmansk 183038, Russia.

10

## 11 Acknowledgments

12 This work is part of the BSECO project funded by Arktis2030 (BSECO Barentshavet i endring  
13 Contract nr. QZA-15/0137). We are grateful to Dr. Randi Ingvaldsen for her help with collecting  
14 the ice cover data. We are also grateful to all the people involved in the joint ecosystem  
15 surveys at the Institute of Marine Research (IMR), Norway, and Polar Branch of the Federal  
16 State Budget Scientific Institution (PINRO), Russia.

17

## 18 Abstract

19 Many marine species are shifting their distribution poleward in response to climate change.  
20 The Barents Sea, as a doorstep to the fast-warming Arctic, is experiencing large scale  
21 changes in its environment and its communities. This paper aims at understanding what  
22 environmental predictors limit fish species habitats in the Barents Sea and discuss their  
23 possible evolution in response to the warming of the Arctic.

24 Species distribution models usually aim at predicting the probability of presence or the average  
25 abundance of a species, conditional on environmental drivers. A complementary approach is  
26 to determine suitable habitats by modelling the upper limit of a species' response to  
27 environmental factors. Using quantile regressions, we model the upper limit of biomass for 33  
28 fish species in the Barents Sea in response to 10 environmental predictors. Boreal species  
29 are mainly limited by temperatures and most of them are expected to be able to expand their  
30 distribution in the Barents Sea when new thermally suitable habitats become available, in the  
31 limit of bathymetric constraints. Arctic species are often limited by several predictors, mainly  
32 depth, bottom and surface temperature and ice cover, and future habitats are hard to predict  
33 qualitatively. Widespread species like the Atlantic cod are not strongly limited by the selected  
34 variables at the scale of the study, and current and future suitable habitats are harder to  
35 predict. These models can be used as input to integrative tools like end-to-end models on the  
36 habitat preference and tolerance at the species scale to inform resource management and  
37 conservation.

38

39 Key words: quantile regression, habitat suitability models, climate change, species  
40 distribution, species shifts, environmental drivers

## 41 **1 INTRODUCTION:**

---

42 There is growing evidence of spatial shifts of species distribution correlated with climate  
43 change (Chen et al., 2011; Hickling et al., 2006; Parmesan and Yohe, 2003; Thomas, 2010).  
44 The Arctic is warming faster than any other ocean in the world (IPCC, 2014). Cheung et al.  
45 (2009) investigated the potential geographical changes in marine biodiversity worldwide in  
46 response to warming and suggested a general increase of species richness in Arctic waters  
47 due to northward migrations of species. The region would experience higher species turnover  
48 rates due to invasion and local extinction than anywhere on the globe. As such, describing  
49 distribution patterns, understanding drivers and projecting potential changes at the species

50 scale is of crucial importance for conservation and management purposes (Marzloff et al.,  
51 2016; Pecl et al., 2017; Porfirio et al., 2014).

52 The Barents Sea is situated on the border of the Arctic. It is under the influence of two water  
53 masses outflowed from the warm, saline Atlantic in the south west and the cold, less saline  
54 Arctic in the north east (Loeng, 1991). Those two masses separate two main communities ,  
55 arctic and boreal, that differ, among other thing, in fish species composition (e.g. Fossheim et  
56 al., 2015; Johannesen et al., 2012), traits (Frainer et al., 2017) and trophic structure (Kortsch  
57 et al., 2015). Important commercial fish (e.g. Atlantic cod, *Gadus morhua*, Atlanto-scandic  
58 herring, *Clupea harengus*, and capelin, *Mallotus villosus*) are present in both types of  
59 communities and respond to climatic signals (Chambault et al., 2018; Hamre, 1994; Matishov  
60 et al., 2012). During past decades, the Barents Sea has been experiencing an increase in  
61 Atlantic water inflow and coinciding heat content in the water column, as well as loss of sea  
62 ice in the northeast (Årthun et al., 2012; Dalpadado et al., 2012; Lind et al., 2018). In the  
63 meantime, the distribution of demersal fish has been altered with a general displacement of  
64 boreal communities towards the northeast (Fossheim et al., 2015). Unfortunately, studies in  
65 Arctic and subarctic waters have sometimes suffered from a lack of appropriate data to provide  
66 robust conclusions about changes in individual species biogeography (Ingvaldsen et al.,  
67 2015). Hollowed et al. (2013) estimated, based on expert knowledge, the potential of 17  
68 species of the sub-arctic regions to shift their distribution northward, following the increased  
69 production in newly ice-free areas. This set of species was quite evenly divided into species  
70 with high, medium and low potential to change their distribution. However, changes in spatial  
71 distribution at the scale of individual species remain uncertain. There is a need for empirical  
72 studies that would help better identify the main drivers of changes in species distributions,  
73 which species are likely to respond most, and to which degree it is possible to make prediction  
74 about future geographical distributions based on currently available information.

75 Because environment is generally assumed to be the main driver of species distribution  
76 (Pearson & Dawson, 2003), most spatial distribution models (SDM) rely solely on  
77 environmental covariates. As such, they predict the suitability of a habitat to host a species

78 based on its mean response (in presence/absence or in abundances) to environmental  
79 conditions. An alternative approach is to explicitly focus on how those factors may limit species  
80 habitats by predicting the upper limit of the species response, i.e. a high quantile (e.g. >0.9)  
81 instead of the mean. The statistical method of quantile regression (QR) (Cade et al., 1999;  
82 Cade & Noon, 2003) provides a useful framework for assessing limiting factors from  
83 observational data. It predicts the expected response for a given quantile  $q$ . With  $q = 0.5$ , QR  
84 predicts the median response. With high  $q$ 's (>0.9), QR predicts the upper limit of the  
85 response. For a set of environment conditions, it is possible to determine the most limiting  
86 factor by considering several single-covariate models and identifying the one that predicts the  
87 lowest response (Austin, 2007). This approach inherits from the Sprengel-Liebig law of the  
88 minimum (van der Ploeg et al., 1999), which considers that a response variable can only be  
89 as high as allowed by the most limiting factor.

90 Quantile regression originated in economics (Koenker and Bassett, 1978) and has been used  
91 in ecology to investigate prey-size-predator size relationship (Bethea et al., 2004), DNA  
92 variation across environmental gradients (Knight and Ackerly, 2002), response to metal  
93 concentrations (Schmidt et al., 2012), and fish recruitment-environment relationship (Planque  
94 and Buffaz, 2008). Review papers have highlighted its utility for the prediction of suitable  
95 habitats (Austin, 2007; Elith and Leathwick, 2009; Hegel et al., 2010), with some applications  
96 for terrestrial (Cade et al., 1999; Carrascal et al., 2016; Jarema et al., 2009; Schröder et al.,  
97 2005) and aquatic species (Ateweberhan et al., 2018; Cozzoli et al., 2013; Dunham et al.,  
98 2002; Lancaster and Belyea, 2006; Lauria et al., 2011; Vaz et al., 2008). Most of the ecological  
99 applications of quantile regression have assumed linear relationships between the biological  
100 response and the predictors. Based on theoretical considerations, the species response to an  
101 environmental factor is expected to be bell-shaped (Hutchinson, 1957; Whittaker, 1967) and  
102 recent studies have applied non-linear quantile regression models to allow for this (Anderson,  
103 2008; Cozzoli et al., 2013; Dunham et al., 2002; Halkos, 2011; Schröder et al., 2005).

104 The aim of the present work is to (i) quantify the limiting effect of the environmental factors  
105 that impact on the spatial distribution of fish in the Barents Sea, (ii) assess the predictability of

106 future geographical distributions based on currently available information and (iii) identify  
107 which species are most likely to respond to future environmental changes. For this purpose,  
108 we analyze data from the autumn ecosystem survey in the Barents Sea on the 33 most  
109 frequently sampled fish species and 10 environmental variables that can potentially limit their  
110 habitat. We develop QR nonlinear models for all combinations of species and environmental  
111 factors.

## 112 **2 MATERIAL AND METHODS**

---

### 113 **2.1 DATA:**

#### 114 **2.1.1 Fish biomass by species**

115 Fishes were caught by a Campelen 1800 bottom trawl during the autumn IMR-PINRO joint  
116 ecosystem survey between 2004 and 2017 (Eriksen et al., 2018). The spatial extent is quite  
117 large (around 1.6 million km<sup>2</sup>), with 278 stations per year in average, depending on the sea  
118 ice extent in the North-eastern part of the sea. The sampling effort is regular in space with 35  
119 nautical miles (35\*1.852 km) between each trawling. The same stations are visited every year,  
120 in the limit of technical, time or climatic feasibility. A grid of 35 x 35 nm was fitted in an albers  
121 equal area projection, so that each grid cell contains only one station. The bulk of the fish  
122 species in the catch of the Campelen bottom trawl contained demersal species. However,  
123 benthopelagic and pelagic fish were also regularly caught in high abundances by the trawl  
124 and they are kept in the analyses. Estimated species biomasses were standardized by unit  
125 area, considering an opening of 25 m of the trawl. Only the trawls towed between 50 m and  
126 500 m depth, in 15 to 60 minutes were kept. Towing speed was about 3 knots. In total, data  
127 comprised 3827 stations and 78 species over the 14 years. Taxa that were absent in more  
128 than 95% of the stations were removed, reducing the number of species to 33.

#### 129 **2.1.2 Environmental predictors**

130 Eleven variables reflecting the environmental conditions of fish habitat were gathered.  
131 Considerations on the nature and number of predictors to include according to sample size  
132 are described in appendix 1.

133 During the ecosystem survey, CTD were used to measure surface (10 m, T.surf) and bottom  
134 temperature ( $^{\circ}\text{C}$ , T.bottom) and salinity (S.surf and S.bottom) at each station. Two  
135 stratification variables were calculated from temperature and salinity profiles following Planque  
136 et al. (2006). The surface mixed layer depth (SML, m) was calculated from a double layer  
137 model, and the potential energy anomaly (PotEnAno,  $\text{kg}\cdot\text{m}^{-1}\cdot\text{s}^{-1}$ , Simpson & Bowers, 1981)  
138 was estimated as the energy required to mix vertically the entire water column.

139 Bathymetry (m) and slope (degrees) were extracted from NOAA raster for the Barents Sea  
140 (Jakobsson et al., 2012). Sediment type was defined by extraction of seafloor description by  
141 NGU (Contains data under the Norwegian license for public data (NLOD) made available by  
142 Norway's geological survey (NGU)). The 16 sediment classes described on the map were  
143 aggregated in 7 coarser classes following the EUNIS sediment hierarchical classification  
144 (Davies et al., 2004). Chlorophyll a (chl<sub>a</sub>,  $\text{mg}/\text{m}^3$ ) average concentration between March and  
145 July of each year, as estimated by the NASA from ocean color (NASA OBPG, 2018). Number  
146 of days with ice cover (daysofice) were counted from daily sea ice extent maps from the NOAA  
147 (Cavalieri et al., 1996). For all those variables, values were extracted at the bottom trawl  
148 station position, i.e. there is only one of each per grid cell and per year.

149 Correlation analysis (described in appendix 2) showed a high correlation of potential energy  
150 anomaly with depth, so the former was removed from the analysis. To assess the potential of  
151 a species habitat suitability to be predicted in a changing environment, the ten remaining  
152 predictors were categorized into *fixed* (bathymetry, slope, sediment) and *dynamic* (all the  
153 others).

## 154 **2.2 ANALYSIS**

### 155 **2.2.1 Species response to environmental predictors**

156 Prior to the regression analysis, species biomass data were log+d-transformed, where d is  
157 half the lowest biomass of the species. All quantitative environmental parameters were  
158 discretized in 20 categories of equal frequency to facilitate the model fitting process. In the

159 case of days of ice cover, as there was a lot of 0, the first category comprised all the 0s, and  
160 the 19 others were spread equiprobably over the rest of the distribution.

161 One quantile generalized additive model (QGAM) was fitted for each pair of species-predictor  
162 (330 models) using the `qgam` function in the `qgam` package in R (Fasiolo et al., 2017) and  
163 setting the quantile level at 99%. The use of QGAMs allows for greater flexibility in the shape  
164 of the relationship between the predictor and the species response than linear quantile  
165 regression. It can capture bell-shaped responses, or responses that reach a plateau for high  
166 or low levels of the predictor. Other considerations about the theoretical roots, strengths and  
167 weaknesses of the methods are quickly described in appendix 3. To avoid regressions with  
168 shapes too complex to be ecologically meaningful, the number of degrees of freedom in the  
169 GAMs was limited to 3. For the qualitative variable (sediment), linear QR was applied to fit the  
170 99<sup>th</sup> quantile within each sediment category. The `rq` function from `quantreg` package in R  
171 (Koenker, 2018) was used.

172 Models were fitted using observations for years 2004 to 2013. They were then evaluated on  
173 observations for years 2014-2017. The evaluation was based on two metrics. The first metric  
174 is the proportion of observations in the evaluation dataset that were below the predicted 99<sup>th</sup>  
175 quantile. It is expected that 99% of the observations should fall below model predictions. If the  
176 observed proportion is higher, this means that the model is overestimating the maximum  
177 biomass (i.e. underestimating the limiting effect of the predictor). If the observed proportion is  
178 lower, too many observations in the evaluation dataset are higher than the expected maximum  
179 value, so the model is underestimating the maximum biomass (i.e. overestimating the limiting  
180 effect of the predictor). We categorized the variation from the 99<sup>th</sup> quantile into a “slight” (98.5  
181 to 99.5% of data below the predictions) and a “strong” (less than 98.5% or more 99.5%)  
182 over/underestimation of the maximum biomass. We considered that a model has a good  
183 predictive power if the predictions show a slight deviation from the 99<sup>th</sup> quantile.

184 The second metric, termed ‘contrast’, is measured for each model on the predicted values, by  
185 the difference between minimum and maximum relative to the maximum. High (close to one)  
186 contrast occurs when the expected response of the species varies greatly across the



187 environmental gradient. The predictor influences the species biomass, and has a limiting effect  
188 when biomasses are low. Low (close to zero) contrast occurs when there are little variations  
189 in the predicted species biomass along the environmental gradient. The predictor has a low  
190 effect on the species and is not limiting in the range of the Barents Sea. In the case of the  
191 sediment type, three of the seven classes (“Compacted sediments or sedimentary bedrock”,  
192 “Sand, gravel and pebbles”, and “Thin or discontinuous sediment on bedrock”) were  
193 associated to less than 1% of all the samples (appendix 4). Those sediment types are ignored  
194 for the calculation of the contrast to ensure that the metric is built on sediment categories that  
195 carry enough information.

## 196 **2.2.2 Spatial prediction of suitable habitats**

197 Each year, it is possible to construct maps of habitat suitability for each species. Each station  
198 is associated with a set of predictor values. For a given species, each model predicts a 99<sup>th</sup>  
199 quantile of biomass in response to that set of predictor values. The most limiting factor is the  
200 one leading to the lowest 99% quantile. From here on, we use the term “most limiting” factor  
201 as defined by this criterion, whether the predictors can have a direct (like bottom temperature  
202 and depth) or indirect limiting effect (like chlorophyll a, which is not in direct link with the  
203 species habitat, but is an indicator of primary production that can indirectly affect bottom  
204 species). The maximum (99<sup>th</sup> quantile) biomass predicted based on the local environmental  
205 conditions is a local measure of habitat suitability. We applied this process to every location  
206 sampled each year.

207 This process results in two maps per year and per species: a habitat suitability map and a  
208 limiting factor map. The habitat suitability map displays the spatial distribution of the expected  
209 maximum biomass. The limiting factor map simply shows the most limiting factor at each  
210 location. However, when the biomasses are high, no factor can be considered limiting. In the  
211 limiting factor maps, wherever the maximum biomass predicted, at a given location, from the  
212 most limiting factor is superior to 25% of the species-predictor model maximum, we considered  
213 the factor to have a “weak limiting effect” on the species at the station. We use three categories  
214 to describe the limiting factors: fixed, dynamic, and weakly limiting (which can be both a



215 dynamic or fixed predictor). From those maps, we looked at the proportion of locations where  
216 a given species biomass is limited by a given predictor. It is computed by i) counting for each  
217 predictor the number of stations where it is the most limiting for a given species a given year,  
218 ii) dividing that count by the number of stations sampled that year and iii) calculating the mean  
219 of that proportion over the years. It provides a measure of the limiting power of each predictor  
220 at the scale of the whole Barents Sea and across species.

### 221 **2.2.3 Predictability of future suitable habitats**

222 To be able to predict a species suitable habitats in the Barents Sea using QGAMs, it is  
223 necessary that i) at least one selected predictor, dynamic or fixed, has an impact on the taxon  
224 response (i.e. the species-predictor model has a high contrast), ii) the value of the predictor(s)  
225 for which the species biomass is limited occurs in the study area and at the temporal scale of  
226 the study, iii) the modelled response is robust to new conditions (i.e. predicted maximum  
227 quantile on the evaluation dataset should be close to the 99<sup>th</sup>), iv) possible differences in  
228 specific respond of different groups of individuals (by age, size, physiological state and other)  
229 within a taxa to the environmental predictor(s) are avoided.

230 To evaluate the potential of a species suitable habitat to shift in a changing environment, we  
231 also look at the maximum contrast in fixed and dynamic predictor models. Species with a  
232 highest contrast in response to dynamic predictors are more susceptible to shift their habitat  
233 to follow changing environmental conditions.

## 234 **3 RESULTS**

---

### 235 **3.1 RESULTS STRUCTURE**

236 Norway pout (*Trisopterus esmarkii*) is used to illustrate the detailed results of the quantile  
237 regression on a single species in response to three predictors: two that are associated with a  
238 high and a low contrast in the species response and one qualitative predictor. This species  
239 was chosen because it showed high contrast in its responses to the selected variables and  
240 high consistency of the predicted quantiles between the training and the testing datasets.

241 The results for all other species analyzed in this study are provided in appendix 5. Tables  
242 summarizing the species responses to the different predictors are in appendix 6. Some  
243 figures use abbreviated species names. The correspondence between abbreviated and full  
244 names is provided in appendix 6.  
245 A synthesis of the models of habitat suitability across all species is presented. In both parts,  
246 habitat suitability maps are shown only for 2013, which was the year with the widest spatial  
247 coverage. Maps for all the species are presented in appendix 7.

## 248 **3.2 LIMITS TO THE DISTRIBUTION OF THE NORWAY POUT (*TRISOPTERUS*** 249 ***ESMARKII*)**

### 250 **3.2.1 Species responses to environmental predictors**

251 **Convergence and predicted quantiles:** *T. esmarkii* modelled response to depth, slope and  
252 sediment converged successfully. When fitted to the training dataset, 99.1% of the  
253 observations were below the modelled response to depth, and 99.0% were below the model  
254 for both slope and sediment (Figure 1). When the same models were applied to the testing  
255 dataset, 99.3% of the observations were below the depth model, and 99.4% below the slope  
256 model. Both models thus slightly overestimate the maximum biomass allowed by those  
257 predictors when applied to new environmental conditions. For sediment, the model strongly  
258 overestimates the maximum biomass of the predictor, with 99.9% of the data below the model.

259 **Model contrast:** The contrast in the response to depth was very high, 0.997. Such high value  
260 indicates that the minimum of the predicted maximum biomass was close to zero, i.e. that the  
261 sampling includes environmental conditions that are very limiting for the species. The  
262 response to slope shows the lowest contrast (0.81), indicating a relatively lower impact of  
263 slope on the species response. The contrast of the modelled response to sediment was  
264 intermediate with 0.90.

265 **Model shape:** The responses of *T. esmarkii* to depth and slope are bell-shaped (Figure 1A  
266 and 1B respectively), although the response to slope is flatter. The “stair” pattern in the model  
267 predictions comes from the discretization of the predictors prior to fitting. The shape of the

268 qualitative predictor, the sediment, is not relevant. The range of observations along the depth  
269 gradient is wide, covering 76% of the bathymetric range of the Barents Sea (from 73 m to 410  
270 m depth, while conditions across the locations sampled scope from 52 to 494m). The  
271 maximum predicted biomasses occur at ~240 m, while the minimal (i.e. the limiting values)  
272 occur at ~70 m. For slope, most of the non-null biomasses were observed in areas with low  
273 degree of slope. For the sediment, the minimum prediction was close to 0 on compacted  
274 sediment or sedimentary bedrock, and maximum for coarse sediment.

275 **Other predictors:** All the modelled responses of *T. esmarkii* to the other predictors converged.  
276 Between 99.0% and 99.2% of the training dataset observations were below the model. The  
277 surface and bottom salinity and surface mixed layer depth models slightly overestimate the  
278 maximum biomass when applied to the testing dataset, with 99.2 to 99.4% of the data below  
279 the predictions. The other models more strongly overestimate the maximum biomass with 99.8  
280 to 99.9% of the testing data below the models. Contrast is high for all the variables: from 0.73,  
281 0.88, and 0.97 for surface mixed layer depth, *surface* and *bottom salinity* respectively to >0.99  
282 for all other predictors.

283 The response of the species to surface temperature and salinity, bottom temperature, surface  
284 mixed layer depth, days of ice cover and chlorophyll *a* concentrations show complete or partial  
285 bell shapes (see appendix 5). The range of response to the different predictors is large,  
286 scoping from 55 to 96% of the conditions over the Barents Sea. Modelled response to bottom  
287 salinity shows a V shape. High biomasses of *T. esmarkii* are associated with warm surface  
288 (~10°C) and bottom (>2.5°C) temperatures, high salinities (>34.5), rather shallow and weak  
289 stratification (SML ~40-50m).

### 290 **3.2.2 Habitat suitability mapping**

291 When applying the models for *T. esmarkii* for a given year, predictions are rather low (i.e.  
292 some factors are very limiting) in most of the Barents Sea, except in the south-west (e.g. in  
293 2013, Figure 2A). Bottom temperature limited biomass in the majority (60.9%) of the stations  
294 in 2013 (58.3% in average across all years) and was most limiting in all the central area of the  
295 Barents Sea. Other environmental parameters are much less limiting. Depth (12.8% in 2013,

296 12.7% in average) is most limiting on the shallow areas of Murmansk bank and north of Bear  
297 Island, or in the depth of the Bear Island trough. Surface temperature was the third most  
298 frequent limiting factor in 2013 (9.0%); but second in average (14.0%). The ice coverage is  
299 the last predictor limiting more than 10% of the samples on average (11.6% on average, 5.4%  
300 in 2013). Both surface temperature and ice cover are most limiting in the north, between  
301 Svalbard and Franz Joseph Land. All other parameters are most limiting for less than 5% of  
302 all the samples in 2013 and on average over the years.

### 303 **3.2.3 Predictability of the suitable habitats:**

304 The maximum contrast in the modeled response of *T. esmarkii* distribution was to depth  
305 (contrast: 0.991) among the static predictors and to bottom temperature (contrast > 0.999)  
306 among the dynamic predictors. However, depth is not that often a limiting factor in the Barents  
307 Sea. It is thus probable that this species suitable habitat will shift in response to changes in  
308 temperature, in the limit of the bathymetric constrains. The predictive power of the *T. esmarkii*  
309 – T. bottom model is poor as it tends to overestimate the maximum biomass, while that of the  
310 *T. esmarkii* – depth model is good. This means that the predicted habitat suitability might be  
311 overestimated if based only on bottom temperature.

## 312 **3.3 LIMITS TO THE DISTRIBUTION OF 33 FISH SPECIES**

### 313 **3.3.1 Species responses to environmental predictors**

314 **Convergence and predicted quantiles:** All models successfully converged. The training and  
315 testing sets performed quite differently on predicting the 99<sup>th</sup> quantile (Figure 3). When fitted  
316 on the training set, most of the models (94%) were between 98.5% and 99.5% of the data.  
317 Only 6% strongly overestimated the maximum biomass (i.e. were above more than 99.5% of  
318 the data). None of them strongly underestimated the maximum biomass.

319 The models performed less well at predicting the 99<sup>th</sup> quantile when applied to the testing data  
320 set, as only 50% of the models were between 98.5 to 99.5% of the data; 38% strongly  
321 overestimated the maximum biomass and 11% strongly underestimated it. One model is an  
322 outlier, performing very poorly in the testing set: *Arctozenus risso* response to sediment. This

323 may be because this species reached higher biomasses in 2016, during the testing set, than  
324 any other year before.

325 **Model contrast:** Most of the model showed relatively high level of contrast: 45% had high  
326 contrast ( $>0.90$ ), and 37% had an intermediate contrast (0.50 to 0.90). Slope has the lowest  
327 mean contrast (0.44) across the 33 species, followed by surface mixed layer depth (0.58).  
328 Surface salinity and chlorophyll a are associated to similar contrast in the species response  
329 ( $\sim 0.75$ ). Following predictors display high contrasts: sediment (0.83), ice cover (0.85), bottom  
330 salinity (0.86) and bottom temperature (0.87). Depth and surface temperature models are the  
331 most contrasted with an average of 0.90.

332 Among temporally fixed predictors, the most contrasted modeled responses were to depth (24  
333 of the 33 species), sediment (8 species) and slope (1 species). Bottom and surface  
334 temperature caused the highest contrast among dynamic predictors for 12 and 13 species  
335 respectively, ice cover for 5 and bottom salinity for 3.

336 **Model shapes:** Most model shapes can be interpreted as a complete or a partial bell, with  
337 large differences in amplitude, from very contrasted to very flat models. Occasionally, species  
338 response models to surface or bottom salinity or ice coverage would take a v shape.  
339 Distribution of the species responses along the different predictor gradients can be found in  
340 appendix 5.

### 341 **3.3.2 Habitat suitability mapping**

342 The mean proportion of samples limited by a single predictor over the years ranged from 0.3  
343 to 58.8% (Figure 4, left panel). Some predictors limit on average 50% or more of a single  
344 species samples: bottom temperature (50.4% of *Argentina silus* samples, 58.3% of  
345 *Trisopterus esmarkii* samples), depth (53.9% of *Arctozenus risso* samples) and surface  
346 temperature (54.3% of *Triglops nybelini* samples).

347 Bottom temperature is the most frequent most limiting predictor (22% of all samples). Depth  
348 is most limiting in 20% of the samples, and surface temperature and sediment in 14%. Slope  
349 (2%), surface mixed layer depth (2%), surface salinity (4%), chlorophyll a (5%), bottom salinity  
350 (7%) and ice cover (8%) are the least limiting among the species. However, these predictors

351 are not always strongly limiting the species biomasses. For 15 of the 33 species,  
352 environmental conditions weakly limit the biomass in most of the sampled locations (Figure 4,  
353 right panel). Dynamic predictors are most often limiting for 17 species and fixed ones only for  
354 1 (*Arctozenus risso*).

### 355 **3.3.3 Predictability of suitable habitats**

356 Profiles of species responses to the selected predictors vary a lot in the Barents Sea (Figure  
357 4). Some species are strongly limited by a low number of predictors, mainly dynamic ones  
358 (Figure 4, top species), while others are rather evenly limited by several predictors (Figure 4,  
359 bottom species). Most frequent most limiting predictors that have good predictive power  
360 (predicted quantile of the testing dataset between 98.5 and 99.5) are sediment, depth and  
361 bottom and surface temperature and bottom salinity. Nearly half (15 out of 33) of the  
362 considered species are most frequently most limited by a predictor for which the model has  
363 good predictive power.

364 It is the case of species situated toward the top of figure 4 for which we can thus evaluate  
365 current suitable habitats. They are limited by a low number of parameters. Those are e.g.  
366 *Arctozenus risso*, *Argentina silus*, *Pollachius virens*, *Gadiculus argenteus* and *Micromesistius*  
367 *poutassou*.

368 *Trisopterus esmarkii*, *Triglops nybelini* and *Sebastes viviparus* are also strongly limited by few  
369 predictors, but their predictive power is less good so the model might over or underestimate  
370 the habitat suitability.

371 Species for which it is hard to decipher suitable from unsuitable habitats are situated toward  
372 the bottom of figure 4 and most of their sample are only weakly limited: e.g. *Amblyraja radiata*,  
373 *Gadus morhua*, *Zoarcidea*, *Hippoglossoides platessoides*, *Anarhichas minor* or *Anarichas*  
374 *denticulatus*. Although some are limited by few predictors, and despite the good predictive  
375 power of the corresponding models, those species tend to be mostly weakly limited by the  
376 environmental variables, i.e. display high predicted biomasses on most of the Barents Sea.

377 For 21 of the 33 species, the maximum contrast to dynamic predictors is higher than that of  
378 the fixed ones (Figure 5). This maximum predictor is bottom salinity for 1 species, ice for 3,

379 bottom temperature for 8 and surface temperature for 9. All those species are thus more  
380 susceptible to shift their habitat to follow a change in the environment, particularly those with  
381 the highest maximum contrast. The 12 other species have higher contrast in fixed predictors.  
382 The maximum predictor is depth for all those 12 species. Those are more constrained by depth  
383 and their habitat might not be influenced by a change in dynamic environmental conditions.

## 384 **4 DISCUSSION:**

---

385 In the present work we explored the limiting effect of 10 environmental predictors on the  
386 individual responses of 33 fish species of the Barents Sea and assessed our capacity to  
387 predict their suitable habitats. From the results, we can estimate the species ability to track  
388 potential changes in their suitable habitats in response to climate change.

### 389 **4.1 LIMITING EFFECT OF ENVIRONMENTAL PREDICTORS ON INDIVIDUAL** 390 **SPECIES SUITABLE HABITATS**

391 The shapes of QGAM models provide the information about the limiting effect of predictors on  
392 species. In this study, QGAMs were fitted with a maximum degree of freedom of 3, so that the  
393 resulting models display simple shapes that can be interpreted in the context of the niche  
394 theory. Most frequently, models display bell shapes that can sometimes be skewed and/or  
395 incomplete (i.e. only one side of the bell is visible). V-shapes occur occasionally (in response  
396 to salinity or ice cover) and are more difficult to interpret. Causes of those v shapes could  
397 include the existence of two population within the Barents Sea with different habitat  
398 preferences, or strong non-linear links to other variables with strong spatial structure (proximity  
399 to coast, river outflow, depth, etc.).

400 The flatness of the model shape is an indicator of the limiting power of the predictor and is  
401 reflected in the contrast metric. Some predictors are more contrasted (i.e. limiting) than others.  
402 Depth and surface and bottom temperature have the highest average contrast over the  
403 considered species. This is consistent with the literature, as many authors have highlighted  
404 the importance of depth and temperature in the habitat requirements of demersal fish over the



405 world (see Johnson et al., 2013 for a review). In the habitat suitability maps, they are also the  
406 most frequent most limiting predictors across the study area. The reason for these three  
407 parameters to limit the distribution of shallow-water species (< 200m depth) in depth and  
408 latitude is well studied (Brown & Thatje, 2015; Pörtner, 2010) and is linked to the thermal, oxic  
409 and hydrostatic conditions necessary for those species to maintain aerobic metabolism.

410 Depth has been reported to be one of the most, if not the most, important predictor of demersal  
411 fish distribution, regardless of the method used or the geographical location of the study  
412 (Chatfield et al., 2010; Leathwick et al., 2006; Moore et al., 2010, 2011; Ross et al., 2015;  
413 Rutterford et al., 2015; Smoliński & Radtke, 2017). In this study, depth was often limiting either  
414 on the shelf for species living in deep areas (e.g. spotted barracudina *Arctozenus risso* or  
415 deepwater redfish *Sebastes mentella*, mainly found in the Bear Island Trough), or on the  
416 deepest and shallowest areas (for e.g. snakeblenny, *Lumpenus lampretiformis*, or wolfish  
417 *Anarhichas lupus*).

418 Limiting values of bottom temperature for the distribution of the demersal fish occur often in  
419 the Barents Sea. For species that are distributed in the south west part of the Barents Sea  
420 (e.g. Norway pout *Trisopterus esmarkii*, greater argentine *Argentinus silus*, saithe *Pollachius*  
421 *virens*, silvery pout *Gadiculus argenteus*) this predictor was the most limiting in more than half  
422 of their samples. Their spatial distribution appear to be limited by the low bottom temperatures  
423 currently occurring in the rest of the Barents Sea. Byrkjedal & Høines (2007) obtained similar  
424 results in a study focusing on the south-western part of the Barents Sea, and explained the  
425 strong influence of the temperature by the conjunction of the cold, subzero, Artic and warm  
426 Atlantic water at the polar front, creating strong latitudinal gradients of temperature.

427 Surface temperatures cause high contrast in the species response are frequently the most  
428 limiting either i) in the north, approximately northeast of the polar front, for some species  
429 distributed mostly in the south of the Barents Sea (e.g. Atlantic herring *Clupea harengus* and  
430 Saithe *P. virens*), or ii) in the south for species considered as arctic (e.g. polar cod *Boreagadus*  
431 *saida* and bigeye sculpin *Triglops nybellini*). Some of those species have been shown to follow  
432 yearly variations in sea ice extent in other sub-arctic areas (Wyllie-Echeverria and Wooster,

433 1998). In our samples, surface temperature and ice cover are often limiting in the same area,  
434 in the North, so the limitation of the species responses by low surface temperature might also  
435 be a proxy of the limitation by cold, ice covered water masses north of the polar front.  
436 The most limiting factors of species suitable habitats revealed by the QGAMs are consistent  
437 with the literature and reflect the strong environmental gradients existing across the Barents  
438 Sea.

## 439 **4.2 ASSESSING OUR CAPACITY TO IDENTIFY SPECIES SUITABLE HABITATS**

440 All the species are not impacted in the same way by the different predictors, and suitable  
441 habitats are thus not equally identifiable across species.

442 Some of the species have a taxonomic resolution too coarse to ensure a uniform response to  
443 the predictors across all individuals. A recent study (Smith et al., 2019) showed that grouping  
444 related taxa that are likely to share environmental tolerances, or splitting species in smaller  
445 population units that have adapted independently can improve niche estimates. In the case of  
446 cod (*Gadus morhua*), or eel pouts (zoarcids) the widespread spatial distributions and  
447 environmental tolerance partially reflect the variety of habitats used by different age groups  
448 (cod) or species (eel pouts). Modelling habitat suitability at a finer biological scale (e.g. by age  
449 or species) might be required to improve habitat suitability models for these groups (M.  
450 McPherson & Jetz, 2007; Morán-Ordóñez et al., 2017; Porfirio et al., 2014; Thuiller et al.,  
451 2005). In addition, suitable habitats are also hard to identify for species that are abundant and  
452 widespread like Long rough dab (*Hippogloissoides platessoides*), Greenland halibut  
453 (*Reinhardtius hippoglossoides*), Thorny skate (*Amblyraja radiata*) and two species of wolfish  
454 (*Anarhichas minor* and *denticulatus*). Long rough dab inhabits most of the Barents Sea and  
455 operates an east to west spawning migration against the larval drift, which allows it to maintain  
456 its position in the region (Walsh, 1996). This shows its wide tolerance for the conditions in the  
457 Barents Sea. The habitat mapping in the current study show that Long rough dab and  
458 Greenland halibut are never strongly limited by environmental conditions, except by extreme  
459 depths in shallow (for Greenland halibut) or deep areas (for Long rough dab). Thorny skate,

460 on the other hand, thrives in all ranges of depth and temperatures of the Barents Sea (Dolgov  
461 et al., 2005). All those species are very abundant across the whole Barents Sea and thus  
462 mostly weakly limited by selected environmental factors. There is therefore substantial  
463 information on where these species are, but little on where there aren't. It is thus difficult to  
464 identify their unsuitable habitats and how environmental conditions may limit their distributions.  
465 Species for which it is possible to identify suitable habitats are e.g. the spotted barracudina  
466 (*Arctozenus risso*), the greater argentine (*Argentina silus*), saithe (*Pollachius virens*), silvery  
467 pout (*Gadiculus argenteus*), Norway pout (*Trisopterus esmarkii*), Norway redfish (*Sebastes*  
468 *viviparus*), or Blue whiting (*Micromesistius poutassou*). Those are exclusively south-western  
469 species inhabiting rather deep areas with warmer Atlantic bottom waters at the entrance of  
470 the Barents Sea. For example, blue whiting and adult saithe resides in the Norwegian Sea  
471 and expands into the Barents Sea when the Norwegian stock is large (for blue whiting: Heino  
472 et al., 2008) or as a seasonal migration during the second and third quarter (for saithe: Olsen  
473 et al., 2010). For all those boreal species, suitable habitats are mainly limited by only one  
474 predictor (most of the time the bottom temperature). *Triglops nybelini* is the only arctic species  
475 for which there is a clear limitation by a single factor, the surface temperature, which highly  
476 linked to ice cover in the north-east.

477 Some species habitats can be determined even though each predictor limits only a small  
478 portion of samples; i.e. there is no clear limitation by a single factor. For those species, the  
479 proportion of samples that are weakly limited by the environment is not as important as for  
480 widespread species, so we have some information on where the species is absent, or in low  
481 abundances. It is the case for the habitats of polar cod (*Boreogadus saida*), capelin (*Mallotus*  
482 *villosus*), eel pouts (liparids), Atlantic poacher (*Leptagonus decagonus*), daubed shanny  
483 (*Leptoclinus maculatus*) or scaled sculpin (*Icelus* spp.). Those are mainly arctic species,  
484 abundant but not widespread in the Barents Sea, spatially limited to colder waters north of the  
485 polar front (Fossheim et al., 2006; Hop & Gjørseter, 2013). We can determine suitable  
486 habitats, but we need for that to consider several predictors.

487

488 The biogeography and the environmental affinity and tolerance of a species in the Barents  
489 Sea seems to be major indicators of our capacity to identify its habitat. Together with the  
490 results of the current study, this help us build hypotheses on the potential shifts in suitable  
491 habitats for individual species of the Barents Sea.

#### 492 **4.3 PREDICTING FUTURE HABITAT SUITABILITY IN RESPONSE TO CLIMATE** 493 **CHANGE**

494 Quantitative predictions of suitable habitats for fish in the Barents Sea can be obtained by  
495 applying the QGAM models on projected maps of predictors showing the possible future  
496 environmental conditions. The predictive power of a model determines how well it will perform  
497 when transferred to a new area or another time, which is particularly important in the context  
498 of climate change (Dormann, 2007; Porfirio et al., 2014). Although it is not possible to  
499 quantitatively assess model's performance in future climate, the recent rapid warming in the  
500 Barents Sea provides suitable conditions to test the performance of the habitat models in two  
501 periods with contrasting ocean climate. Half of the models performed well when applied to the  
502 testing dataset. The poorer performances of the other models may reflect that the training  
503 dataset did not include enough of the variability in the species response to the predictor. For  
504 those models, prediction can still be done, but the resulting habitat suitability might be  
505 over/underestimated.

506  
507 Without projected environmental maps, it is still possible to use the results from the QGAM fit  
508 to hypothesize qualitatively the evolution of Barents Sea fish suitable habitats in response to  
509 environmental changes. Recent climate predictions show increasing water temperatures in  
510 the Barents Sea (Stenevik & Sundby, 2007) and decrease in sea ice possibly leading to ice  
511 free winters by 2061-2088 (Onarheim & Årthun, 2017). Species that would be more sensitive  
512 to these projected changes, i.e. that would be forced to move to track suitable habitats, are  
513 those that display a highest contrast in response to dynamic - rather than fixed - variables.  
514 This is the case for two thirds of the species. The limiting factors are bottom and surface

515 temperature (that is projected to increase with climate change), bottom salinity (correlated to  
516 depth) and ice cover (which is projected to decrease). However, species tracking their  
517 environment might be limited in their progress by unsuitable fixed environmental conditions. A  
518 good example is *Anarhichas lupus*, which responds with the highest contrast to ice but is more  
519 often limited by depth across the Barents Sea. Predicting its future suitable habitat necessitate  
520 to consider both fixed and dynamic parameters. This supports a recent study projecting that  
521 depth will strongly limit the availability of suitable habitats (Rutterford et al., 2015).

522

523 Predicting potential shifts in suitable habitat for a species thus requires integrating all the  
524 information gathered in the current study on niche preferences and ranges, most contrasted  
525 models, spatially most limiting factors, response to dynamic and fixed factors and predictability  
526 of suitable habitats. Here we make tentative qualitative predictions on the future of demersal  
527 fish in the Barents Sea based on the two most limiting predictors of the region: bottom  
528 temperature and depth (Figure 6).

529 The warming of the Barents Sea is likely to increase the extent of suitable habitat for species  
530 with preferences for warmer waters (right side of the figure 6). They are susceptible to migrate  
531 or expand northward as new habitats become available, if the depth is suitable. The species  
532 concerned respond strongly to and are spatially more limited by either bottom or surface  
533 temperature. They are species for which it is easy to estimate qualitatively their future habitat  
534 because few predictors control their niche at the scale of the Barents Sea. Species that prefer  
535 intermediate depths (*Micromesistius poutassou*, *Argentina silus*, *Gadiculus argenteus*,  
536 *Sebastes norvegicus* and *viviparus*, *Trisopterus esmarkii* and *Pollachius virens*) and two  
537 shallower species (*Clupea harengus* and *Melanogrammus aeglefinus*) are likely to migrate  
538 north as most of the Barents Sea is in the range of their suitable depths. This is supported in  
539 the literature. Ecological niche models have predicted a gain in suitable habitat in the Barents  
540 Sea for saithe (*P. virens*) and haddock (*M. aeglefinus*) in the middle of the Barents Sea  
541 between 1960 and 2090 (Lenoir et al., 2011). (Hollowed et al., 2013) also hypothesized a  
542 northward shift of *C. harengus*. Some of those species have already been noticed to displace

543 northward: (Perry et al., 2005) noticed that *M. poutassou* and *T. esmarkii* distribution  
544 boundaries have shifted northward in relation to the warming between 1977 and 2001 in the  
545 North Sea, and in the Barents Sea, both species and *A. silus* are part of the boreal or  
546 intermediate communities that also have shifted between 2004-2012 (Fossheim et al., 2015).  
547 Unlike this group of species, *A. lupus* is already widespread on the shallow banks of the  
548 Barents Sea and is spatially limited by depth and sediment in its northern boundary. It is thus  
549 unlikely that the warming will open new suitable habitats for that species. However, this  
550 species is also limited by other parameters so future suitable habitats are hard to predict.

551

552 Temperature increase in the Barents Sea will cause the loss of the coldest habitats of the  
553 region. Species that prefer cold habitats (left side of figure 6) are the most threatened as they  
554 will then experience temperatures warmer than their current optima. To come back to  
555 temperatures closer to their optimum, they would need to migrate further north into the deep  
556 Arctic ocean, or retract around Svalbard where they would ultimately be trapped if they don't  
557 tolerate high depths. The concerned species are mainly arctic ones with large depth tolerance,  
558 so both scenarios are possible. Ribbed sculpin (*Triglops pingelii*) and Arctic alligatorfish  
559 (*Aspidophoroides olrikii*) are exceptions as they respond more strongly to depth and might not  
560 be able to retract to deeper and colder areas. However, all those species are part of the group  
561 for which suitable habitats are harder to predict qualitatively because of the many predictors  
562 involved in the biomass limitation. To understand potential shifts in their future habitat, the  
563 knowledge gained on their habitat requirements needs to be integrated and applied to  
564 projected environmental conditions.

565

566 Species currently preferring intermediate temperatures (0 to 2°C) can be divided into shallow  
567 and intermediate depth loving species and deep associated ones. Shallower species  
568 (optimum >300m) are generally widespread. Some are common over the whole Barents Sea  
569 (like *Gadus morhua*, *Hippoglossoides platessoides* or *Ambyraja radiata*) and little can be said  
570 about their future habitat. Others are widespread in the north and south-east of the Barents

571 Sea (*Leptoclinus maculatus*, *Lumpenus lampretaeformis*, *Leptagonus. decagonus*, *Artediellus*  
572 *atlanticus*, *Triglops nybellini* and *Amblyraja hyperborea*). They all tolerate a wide range of  
573 depth conditions so they would be able to track their preferred environmental conditions by  
574 moving northward or diving deeper. However most of them are also limited by other predictors,  
575 so their future suitable habitats is hard to estimate qualitatively.

576 Deeper species (*Cottunculus microps*, *Reinhardtius hippoglossoides*, *Anarhichas*  
577 *denticulatus*, *Arctozenus risso* and *Sebastes mentella*) are mainly found around the Bear  
578 island Trough. Their response to climate change depends more on their tolerance to shallower  
579 depths. *R. hippoglossoides* and *A. denticulatus* are widespread, with wide tolerance to depth  
580 and might be able to expand northward. In Hollowed et al. (2013), *R. hippoglossoides* is indeed  
581 suspected to move in or expand in the high Arctic. *S. mentella* is more constrained by  
582 shallower depths but has expanded into the Barents Sea during the period of the study (as  
583 hypothesized by Hollowed et al., 2013). *A. risso* however, is not very tolerant to shallower  
584 depth and respond strongly to salinity (which is itself very correlated to depth). If its habitat  
585 conditions were to change, the species could not move northward on the shallower Barents  
586 Sea shelf.

587 Similar tradeoffs will constantly occur for all species as changes in dynamic variables will  
588 interact with limitations caused by fixed ones. Light conditions might be a particularly strong  
589 tradeoff at those latitudes (Poloczanska et al., 2016).

## 590 **5 CONCLUSIONS**

---

591 The use of QGAM allowed to explore the potential environmental niche of 33 fish species in  
592 the Barents Sea. The models show a wide variety of responses to environmental stressors.  
593 The application of the Liebig's law on the mapped conditions of the region highlighted the  
594 importance of depth and temperatures as limiting factors for most of the species. But the set  
595 of selected predictors influence each taxon differently, which leads to some species suitable  
596 habitats being more difficult to predict than others. While species responding more strongly to  
597 dynamic variables should be the most responsive to changes in their habitats, this study



598 highlighted the importance of considering their interaction with fixed predictors when predicting  
599 future suitable habitats.

600 In the face of the complexity of the response at the individual species scale, it seems clear  
601 that explaining and predicting the responses of whole communities to changes in their habitat  
602 is challenging. Yet, ecosystem studies need for those individual responses to be integrated at  
603 larger scales. An advantage of the QGAM methods is that the models can easily be used as  
604 habitat preferences prior that input end-to-endo models. This would allow to predict suitable  
605 habitats maps on top of which other processes would refine the species distribution. Such  
606 empirical knowledge at the basis of the modelling process would greatly benefit our models  
607 and can inform resource management and conservation.

## 608 **6 REFERENCES**

---

- 609 Anderson, M. J. (2008). Animal-sediment relationships re-visited: Characterising species'  
610 distributions along an environmental gradient using canonical analysis and quantile  
611 regression splines. *Journal of Experimental Marine Biology and Ecology*, 366(1), 16–27.  
612 <https://doi.org/10.1016/j.jembe.2008.07.006>
- 613 Årthun, M., Eldevik, T., Smedsrud, L. H., Skagseth, Ø., & Ingvaldsen, R. B. (2012). Quantifying the  
614 Influence of Atlantic Heat on Barents Sea Ice Variability and Retreat. *Journal of Climate*,  
615 25(13), 4736–4743. <https://doi.org/10.1175/JCLI-D-11-00466.1>
- 616 Ateweberhan, M., McClanahan, T. R., Maina, J., & Sheppard, C. (2018). Thermal energy and stress  
617 properties as the main drivers of regional distribution of coral species richness in the Indian  
618 Ocean. *Journal of Biogeography*, 45(6), 1355–1366. <https://doi.org/10.1111/jbi.13224>
- 619 Austin, M. (2007). Species distribution models and ecological theory: A critical assessment and some  
620 possible new approaches. *Ecological Modelling*, 200(1), 1–19.  
621 <https://doi.org/10.1016/j.ecolmodel.2006.07.005>

- 622 Bethea, D. M., Buckel, J. A., & Carlson, J. K. (2004). Foraging ecology of the early life stages of four  
623 sympatric shark species. *Marine Ecology Progress Series*, 268, 245–264.  
624 <https://doi.org/10.3354/meps268245>
- 625 Brown, A., & Thatje, S. (2015). The effects of changing climate on faunal depth distributions  
626 determine winners and losers. *Global Change Biology*, 21(1), 173–180.  
627 <https://doi.org/10.1111/gcb.12680>
- 628 Byrkjedal, I., & Høines, Å. (2007). Distribution of demersal fish in the south-western Barents Sea.  
629 *Polar Research*, 26(2), 135–151. <https://doi.org/10.1111/j.1751-8369.2007.00030.x>
- 630 Cade, B. S., & Noon, B. R. (2003). A gentle introduction to quantile regression for ecologists. *Frontiers*  
631 *in Ecology and the Environment*, 1(8), 412–420. [https://doi.org/10.1890/1540-](https://doi.org/10.1890/1540-9295(2003)001[0412:AGITQR]2.0.CO;2)  
632 [9295\(2003\)001\[0412:AGITQR\]2.0.CO;2](https://doi.org/10.1890/1540-9295(2003)001[0412:AGITQR]2.0.CO;2)
- 633 Cade, B. S., Terrell, J. W., & Schroeder, R. L. (1999). Estimating Effects of Limiting Factors with  
634 Regression Quantiles. *Ecology*, 80(1), 311–323. [https://doi.org/10.1890/0012-](https://doi.org/10.1890/0012-9658(1999)080[0311:EEOLFW]2.0.CO;2)  
635 [9658\(1999\)080\[0311:EEOLFW\]2.0.CO;2](https://doi.org/10.1890/0012-9658(1999)080[0311:EEOLFW]2.0.CO;2)
- 636 Carrascal, L. M., Villén-Pérez, S., & Palomino, D. (2016). Preferred temperature and thermal breadth  
637 of birds wintering in peninsular Spain: The limited effect of temperature on species  
638 distribution. *PeerJ*, 4, e2156. <https://doi.org/10.7717/peerj.2156>
- 639 Cavalieri, D. J., Parkinson, C. L., Gloersen, P., & Zwally, H. J. (1996). Sea Ice Concentrations from  
640 Nimbus-7 SMMR and DMSP SSM/I-SSMIS Passive Microwave Data, Version 1. *Boulder,*  
641 *Colorado USA. NASA National Snow and Ice Data Center Distributed Active Archive Center.*  
642 <https://doi.org/10.5067/8GQ8LZQVL0VL>.
- 643 Chambault, P., Albertsen, C. M., Patterson, T. A., Hansen, R. G., Tervo, O., Laidre, K. L., & Heide-  
644 Jørgensen, M. P. (2018). Sea surface temperature predicts the movements of an Arctic  
645 cetacean: The bowhead whale. *Scientific Reports*, 8(1), 1–12.  
646 <https://doi.org/10.1038/s41598-018-27966-1>

- 647 Chatfield, B. S., Niel, K. P. V., Kendrick, G. A., & Harvey, E. S. (2010). Combining environmental  
648 gradients to explain and predict the structure of demersal fish distributions. *Journal of*  
649 *Biogeography*, 37(4), 593–605. <https://doi.org/10.1111/j.1365-2699.2009.02246.x>
- 650 Chen, I.-C., Hill, J. K., Ohlemüller, R., Roy, D. B., & Thomas, C. D. (2011). Rapid Range Shifts of Species  
651 Associated with High Levels of Climate Warming. *Science*, 333(6045), 1024–1026.  
652 <https://doi.org/10.1126/science.1206432>
- 653 Cheung, W. W. L., Lam, V. W. Y., Sarmiento, J. L., Kearney, K., Watson, R., & Pauly, D. (2009).  
654 Projecting global marine biodiversity impacts under climate change scenarios. *Fish and*  
655 *Fisheries*, 10(3), 235–251. <https://doi.org/10.1111/j.1467-2979.2008.00315.x>
- 656 Cozzoli, F., Bouma, T. J., Ysebaert, T., & Herman, P. M. J. (2013). Application of non-linear quantile  
657 regression to macrozoobenthic species distribution modelling: Comparing two contrasting  
658 basins. *Marine Ecology Progress Series*, 475, 119–133. JSTOR.
- 659 Dalpadado, P., Ingvaldsen, R. B., Stige, L. C., Bogstad, B., Knutsen, T., Ottersen, G., & Ellertsen, B.  
660 (2012). Climate effects on Barents Sea ecosystem dynamics. *ICES Journal of Marine Science*,  
661 69(7), 1303–1316. <https://doi.org/10.1093/icesjms/fss063>
- 662 Davies, C. E., Moss, D., & Hill, M. O. (2004). *EUNIS HABITAT CLASSIFICATION REVISED 2004*. 311.
- 663 Dolgov, A. V., Grekov, A. A., Shestopal, I. P., & Sokolov, K. M. (2005). By-catch of Skates in Trawl and  
664 Long-Line Fisheries in the Barents Sea. *Journal of Northwest Atlantic Fishery Science*, 35,  
665 357–366. <https://doi.org/10.2960/J.v35.m524>
- 666 Dormann, C. F. (2007). Promising the future? Global change projections of species distributions.  
667 *Basic and Applied Ecology*, 8(5), 387–397. <https://doi.org/10.1016/j.baae.2006.11.001>
- 668 Dunham, J. B., Cade, B. S., & Terrell, J. W. (2002). Influences of Spatial and Temporal Variation on  
669 Fish-Habitat Relationships Defined by Regression Quantiles. *Transactions of the American*  
670 *Fisheries Society*, 131(1), 86–98. [https://doi.org/10.1577/1548-](https://doi.org/10.1577/1548-8659(2002)131<0086:IOSATV>2.0.CO;2)  
671 [8659\(2002\)131<0086:IOSATV>2.0.CO;2](https://doi.org/10.1577/1548-8659(2002)131<0086:IOSATV>2.0.CO;2)

- 672 Elith, J., & Leathwick, J. R. (2009). Species Distribution Models: Ecological Explanation and Prediction  
673 Across Space and Time. *Annual Review of Ecology, Evolution, and Systematics*, 40(1), 677–  
674 697. <https://doi.org/10.1146/annurev.ecolsys.110308.120159>
- 675 Eriksen, E., Gjørseter, H., Prozorkevich, D., Shamray, E., Dolgov, A., Skern-Mauritzen, M., Stiansen, J.  
676 E., Kovalev, Yu., & Sunnanå, K. (2018). From single species surveys towards monitoring of the  
677 Barents Sea ecosystem. *Progress in Oceanography*, 166, 4–14.  
678 <https://doi.org/10.1016/j.pocean.2017.09.007>
- 679 Fasiolo, M., Goude, Y., Nedellec, R., & Wood, S. N. (2017). *Fast calibrated additive quantile*  
680 *regression*. <https://arxiv.org/abs/1707.03307>
- 681 Fossheim, M., Nilssen, E. M., & Aschan, M. (2006). Fish assemblages in the Barents Sea. *Marine*  
682 *Biology Research*, 2(4), 260–269. <https://doi.org/10.1080/17451000600815698>
- 683 Fossheim, M., Primicerio, R., Johannesen, E., Ingvaldsen, R. B., Aschan, M. M., & Dolgov, A. V. (2015).  
684 Recent warming leads to a rapid borealization of fish communities in the Arctic. *Nature*  
685 *Climate Change*, 5(7), 673–677. <https://doi.org/10.1038/nclimate2647>
- 686 Frainer, A., Primicerio, R., Kortsch, S., Aune, M., Dolgov, A. V., Fossheim, M., & Aschan, M. M. (2017).  
687 Climate-driven changes in functional biogeography of Arctic marine fish communities.  
688 *Proceedings of the National Academy of Sciences*, 114(46), 12202–12207.  
689 <https://doi.org/10.1073/pnas.1706080114>
- 690 Halkos, G. E. (2011). Nonparametric modelling of biodiversity: Determinants of threatened species.  
691 *Journal of Policy Modeling*, 33(4), 618–635. <https://doi.org/10.1016/j.jpolmod.2010.12.005>
- 692 Hamre, J. (1994). Biodiversity and exploitation of the main fish stocks in the Norwegian—Barents Sea  
693 ecosystem. *Biodiversity & Conservation*, 3(6), 473–492. <https://doi.org/10.1007/BF00115154>
- 694 Hegel, T. M., Cushman, S. A., Evans, J., & Huettmann, F. (2010). Current State of the Art for Statistical  
695 Modelling of Species Distributions. In S. A. Cushman & F. Huettmann (Eds.), *Spatial*  
696 *Complexity, Informatics, and Wildlife Conservation* (pp. 273–311). Springer Japan.  
697 [https://doi.org/10.1007/978-4-431-87771-4\\_16](https://doi.org/10.1007/978-4-431-87771-4_16)

- 698 Heino, M., Engelhard, G. H., & Godø, O. R. (2008). Migrations and hydrography determine the  
699 abundance fluctuations of blue whiting (*Micromesistius poutassou*) in the Barents Sea.  
700 *Fisheries Oceanography*, 17(2), 153–163. <https://doi.org/10.1111/j.1365-2419.2008.00472.x>
- 701 Hickling, R., Roy, D. B., Hill, J. K., Fox, R., & Thomas, C. D. (2006). The distributions of a wide range of  
702 taxonomic groups are expanding polewards. *Global Change Biology*, 12(3), 450–455.  
703 <https://doi.org/10.1111/j.1365-2486.2006.01116.x>
- 704 Hollowed, A. B., Planque, B., & Loeng, H. (2013). Potential movement of fish and shellfish stocks  
705 from the sub-Arctic to the Arctic Ocean. *Fisheries Oceanography*, 22(5), 355–370.  
706 <https://doi.org/10.1111/fog.12027>
- 707 Hop, H., & Gjørseter, H. (2013). Polar cod (*Boreogadus saida*) and capelin (*Mallotus villosus*) as key  
708 species in marine food webs of the Arctic and the Barents Sea. *Marine Biology Research*,  
709 9(9), 878–894. <https://doi.org/10.1080/17451000.2013.775458>
- 710 Hutchinson, G. E. (1957). Cold spring harbor symposium on quantitative biology. *Concluding*  
711 *Remarks*, 22, 415–427.
- 712 Ingvaldsen, R. B., Bogstad, B., Dolgov, A. V., Ellingsen, K. E., Gjørseter, H., Gradinger, R., Johannesen,  
713 E., Tveraa, T., & Yoccoz, N. G. (2015). Sources of uncertainties in cod distribution models.  
714 *Nature Climate Change*, 5(9), 788–789. <https://doi.org/10.1038/nclimate2761>
- 715 IPCC, I. P. O. C. C. (2014). *Climate Change 2013: The Physical Science Basis: Working Group I*  
716 *Contribution to the Fifth Assessment Report of the Intergovernmental Panel on Climate*  
717 *Change*. Cambridge University Press.
- 718 Jakobsson, M., Mayer, L., Coakley, B., Dowdeswell, J. A., Forbes, S., Fridman, B., Hodnesdal, H.,  
719 Noormets, R., Pedersen, R., Rebecco, M., Schenke, H. W., Zarayskaya, Y., Accettella, D., ...  
720 Armstrong, A., Anderson, R. M., Bienhoff, P., Camerlenghi, A., Church, I., Edwards, M., ...  
721 Weatherall, P. (2012). The International Bathymetric Chart of the Arctic Ocean (IBCAO)  
722 Version 3.0: IBCAO VERSION 3.0. *Geophysical Research Letters*, 39(12), n/a-n/a.  
723 <https://doi.org/10.1029/2012GL052219>

- 724 Jarema, S. I., Samson, J., McGill, B. J., & Humphries, M. M. (2009). Variation in abundance across a  
725 species' range predicts climate change responses in the range interior will exceed those at  
726 the edge: A case study with North American beaver. *Global Change Biology*, *15*(2), 508–522.  
727 <https://doi.org/10.1111/j.1365-2486.2008.01732.x>
- 728 Johannesen, E., Høines, Å. S., Dolgov, A. V., & Fossheim, M. (2012). Demersal Fish Assemblages and  
729 Spatial Diversity Patterns in the Arctic-Atlantic Transition Zone in the Barents Sea. *PLOS ONE*,  
730 *7*(4), e34924. <https://doi.org/10.1371/journal.pone.0034924>
- 731 Johnson, A. F., Jenkins, S. R., Hiddink, J. G., & Hinz, H. (2013). Linking temperate demersal fish  
732 species to habitat: Scales, patterns and future directions. *Fish and Fisheries*, *14*(3), 256–280.  
733 <https://doi.org/10.1111/j.1467-2979.2012.00466.x>
- 734 Knight, C. A., & Ackerly, D. D. (2002). Variation in nuclear DNA content across environmental  
735 gradients: A quantile regression analysis. *Ecology Letters*, *5*(1), 66–76.  
736 <https://doi.org/10.1046/j.1461-0248.2002.00283.x>
- 737 Koenker, R. (2018). *Quantreg: Quantile Regression. R package version 5.38*. [https://CRAN.R-](https://CRAN.R-project.org/package=quantreg)  
738 [project.org/package=quantreg](https://CRAN.R-project.org/package=quantreg)
- 739 Koenker, R., & Bassett, G. (1978). Regression Quantiles. *Econometrica*, *46*(1), 33.  
740 <https://doi.org/10.2307/1913643>
- 741 Kortsch, S., Primicerio, R., Fossheim, M., Dolgov, A. V., & Aschan, M. (2015). Climate change alters  
742 the structure of arctic marine food webs due to poleward shifts of boreal generalists.  
743 *Proceedings of the Royal Society B: Biological Sciences*, *282*(1814), 20151546.  
744 <https://doi.org/10.1098/rspb.2015.1546>
- 745 Lancaster, J., & Belyea, L. R. (2006). Defining the limits to local density: Alternative views of  
746 abundance–environment relationships. *Freshwater Biology*, *51*(4), 783–796.  
747 <https://doi.org/10.1111/j.1365-2427.2006.01518.x>
- 748 Lauria, V., Vaz, S., Martin, C. S., Mackinson, S., & Carpentier, A. (2011). What influences European  
749 plaice (*Pleuronectes platessa*) distribution in the eastern English Channel? Using habitat

750 modelling and GIS to predict habitat utilization. *ICES Journal of Marine Science*, 68(7), 1500–  
751 1510. <https://doi.org/10.1093/icesjms/fsr081>

752 Leathwick, J. R., Elith, J., Francis, M. P., Hastie, T., & Taylor, P. (2006). Variation in demersal fish  
753 species richness in the oceans surrounding New Zealand: An analysis using boosted  
754 regression trees. *Marine Ecology Progress Series*, 321, 267–281.  
755 <https://doi.org/10.3354/meps321267>

756 Lenoir, S., Beaugrand, G., & Lecuyer, É. (2011). Modelled spatial distribution of marine fish and  
757 projected modifications in the North Atlantic Ocean. *Global Change Biology*, 17(1), 115–129.  
758 <https://doi.org/10.1111/j.1365-2486.2010.02229.x>

759 Lind, S., Ingvaldsen, R. B., & Furevik, T. (2018). Arctic warming hotspot in the northern Barents Sea  
760 linked to declining sea-ice import. *Nature Climate Change*, 8(7), 634.  
761 <https://doi.org/10.1038/s41558-018-0205-y>

762 Loeng, H. (1991). Features of the physical oceanographic conditions of the Barents Sea. *Polar*  
763 *Research*, 10(1), 5–18. <https://doi.org/10.3402/polar.v10i1.6723>

764 M. McPherson, J., & Jetz, W. (2007). Effects of species' ecology on the accuracy of distribution  
765 models. *Ecography*, 30(1), 135–151. <https://doi.org/10.1111/j.0906-7590.2007.04823.x>

766 Marzloff, M. P., Melbourne-Thomas, J., Hamon, K. G., Hoshino, E., Jennings, S., Putten, I. E. van, &  
767 Pecl, G. T. (2016). Modelling marine community responses to climate-driven species  
768 redistribution to guide monitoring and adaptive ecosystem-based management. *Global*  
769 *Change Biology*, 22(7), 2462–2474. <https://doi.org/10.1111/gcb.13285>

770 Matishov, G., Moiseev, D., Lyubina, O., Zhichkin, A., Dzhenyuk, S., Karamushko, O., & Frolova, E.  
771 (2012). Climate and cyclic hydrobiological changes of the Barents Sea from the twentieth to  
772 twenty-first centuries. *Polar Biology*, 35(12), 1773–1790. [https://doi.org/10.1007/s00300-](https://doi.org/10.1007/s00300-012-1237-9)  
773 012-1237-9



- 774 Moore, C. H., Harvey, E. S., & Van Niel, K. (2010). The application of predicted habitat models to  
775 investigate the spatial ecology of demersal fish assemblages. *Marine Biology*, 157(12), 2717–  
776 2729. <https://doi.org/10.1007/s00227-010-1531-4>
- 777 Moore, C. H., Van Niel, K., & Harvey, E. S. (2011). The effect of landscape composition and  
778 configuration on the spatial distribution of temperate demersal fish. *Ecography*, 34(3), 425–  
779 435. <https://doi.org/10.1111/j.1600-0587.2010.06436.x>
- 780 Morán-Ordóñez, A., Lahoz-Monfort, J. J., Elith, J., & Wintle, B. A. (2017). Evaluating 318 continental-  
781 scale species distribution models over a 60-year prediction horizon: What factors influence  
782 the reliability of predictions? *Global Ecology and Biogeography*, 26(3), 371–384.  
783 <https://doi.org/10.1111/geb.12545>
- 784 NASA OBPG, N. G. S. F. C., Ocean Ecology Laboratory, Ocean Biology Processing Group. (2018).  
785 Moderate-resolution Imaging Spectroradiometer (MODIS) Aqua Chlorophyll Data; 2018  
786 Reprocessing. *NASA OB.DAAC, Greenbelt, MD, USA*.  
787 <https://doi.org/data/10.5067/AQUA/MODIS/L3M/CHL/2018>.
- 788 Olsen, E., Aanes, S., Mehl, S., Holst, J. C., Aglen, A., & Gjørseter, H. (2010). Cod, haddock, saithe,  
789 herring, and capelin in the Barents Sea and adjacent waters: A review of the biological value  
790 of the area. *ICES Journal of Marine Science*, 67(1), 87–101.  
791 <https://doi.org/10.1093/icesjms/fsp229>
- 792 Onarheim, I. H., & Årthun, M. (2017). Toward an ice-free Barents Sea. *Geophysical Research Letters*,  
793 44(16), 8387–8395. <https://doi.org/10.1002/2017GL074304>
- 794 Parmesan, C., & Yohe, G. (2003). A globally coherent fingerprint of climate change impacts across  
795 natural systems. *Nature*, 421(6918), 37–42. <https://doi.org/10.1038/nature01286>
- 796 Pearson, R. G., & Dawson, T. P. (2003). Predicting the impacts of climate change on the distribution  
797 of species: Are bioclimate envelope models useful? *Global Ecology and Biogeography*, 12(5),  
798 361–371. <https://doi.org/10.1046/j.1466-822X.2003.00042.x>

- 799 Pecl, G. T., Araújo, M. B., Bell, J. D., Blanchard, J., Bonebrake, T. C., Chen, I.-C., Clark, T. D., Colwell, R.  
800 K., Danielsen, F., Evengård, B., Falconi, L., Ferrier, S., Frusher, S., Garcia, R. A., Griffis, R. B.,  
801 Hobday, A. J., Janion-Scheepers, C., Jarzyna, M. A., Jennings, S., ... Williams, S. E. (2017).  
802 Biodiversity redistribution under climate change: Impacts on ecosystems and human well-  
803 being. *Science*, 355(6332). <https://doi.org/10.1126/science.aai9214>
- 804 Perry, A. L., Low, P. J., Ellis, J. R., & Reynolds, J. D. (2005). Climate Change and Distribution Shifts in  
805 Marine Fishes. *Science*, 308(5730), 1912–1915. <https://doi.org/10.1126/science.1111322>
- 806 Planque, B., & Buffaz, L. (2008). Quantile regression models for fish recruitment–environment  
807 relationships: Four case studies. *Marine Ecology Progress Series*, 357, 213–223.  
808 <https://doi.org/10.3354/meps07274>
- 809 Planque, B., Lazure, P., & Jegou, A.-M. (2006). Typology of hydrological structures modelled and  
810 observed over the Bay of Biscay shelf. *Scientia Marina*, 70(S1), 43–50.  
811 <https://doi.org/10.3989/scimar.2006.70s143>
- 812 Poloczanska, E. S., Burrows, M. T., Brown, C. J., García Molinos, J., Halpern, B. S., Hoegh-Guldberg,  
813 O., Kappel, C. V., Moore, P. J., Richardson, A. J., Schoeman, D. S., & Sydeman, W. J. (2016).  
814 Responses of Marine Organisms to Climate Change across Oceans. *Frontiers in Marine*  
815 *Science*, 3. <https://doi.org/10.3389/fmars.2016.00062>
- 816 Porfirio, L. L., Harris, R. M. B., Lefroy, E. C., Hugh, S., Gould, S. F., Lee, G., Bindoff, N. L., & Mackey, B.  
817 (2014). Improving the Use of Species Distribution Models in Conservation Planning and  
818 Management under Climate Change. *PLOS ONE*, 9(11), e113749.  
819 <https://doi.org/10.1371/journal.pone.0113749>
- 820 Pörtner, H.-O. (2010). Oxygen- and capacity-limitation of thermal tolerance: A matrix for integrating  
821 climate-related stressor effects in marine ecosystems. *Journal of Experimental Biology*,  
822 213(6), 881–893. <https://doi.org/10.1242/jeb.037523>

- 823 Ross, S. W., Rhode, M., & Quattrini, A. M. (2015). Demersal fish distribution and habitat use within  
824 and near Baltimore and Norfolk Canyons, U.S. middle Atlantic slope. *Deep Sea Research Part*  
825 *I: Oceanographic Research Papers*, 103, 137–154. <https://doi.org/10.1016/j.dsr.2015.06.004>
- 826 Rutterford, L. A., Simpson, S. D., Jennings, S., Johnson, M. P., Blanchard, J. L., Schön, P.-J., Sims, D.  
827 W., Tinker, J., & Genner, M. J. (2015). Future fish distributions constrained by depth in  
828 warming seas. *Nature Climate Change*, 5(6), 569–573. <https://doi.org/10.1038/nclimate2607>
- 829 Schmidt, T. S., Clements, W. H., & Cade, B. S. (2012). Estimating risks to aquatic life using quantile  
830 regression. *Freshwater Science*, 31(3), 709–723. <https://doi.org/10.1899/11-133.1>
- 831 Schröder, H. K., Andersen, H. E., & Kiehl, K. (2005). Rejecting the mean: Estimating the response of  
832 fen plant species to environmental factors by non-linear quantile regression. *Journal of*  
833 *Vegetation Science*, 16(4), 373–382. <https://doi.org/10.1111/j.1654-1103.2005.tb02376.x>
- 834 Simpson, J. H., & Bowers, D. (1981). Models of stratification and frontal movement in shelf seas.  
835 *Deep Sea Research Part A. Oceanographic Research Papers*, 28(7), 727–738.  
836 [https://doi.org/10.1016/0198-0149\(81\)90132-1](https://doi.org/10.1016/0198-0149(81)90132-1)
- 837 Smith, A. B., Godsoe, W., Rodríguez-Sánchez, F., Wang, H.-H., & Warren, D. (2019). Niche Estimation  
838 Above and Below the Species Level. *Trends in Ecology & Evolution*, 34(3), 260–273.  
839 <https://doi.org/10.1016/j.tree.2018.10.012>
- 840 Smoliński, S., & Radtke, K. (2017). Spatial prediction of demersal fish diversity in the Baltic Sea:  
841 Comparison of machine learning and regression-based techniques. *ICES Journal of Marine*  
842 *Science*, 74(1), 102–111. <https://doi.org/10.1093/icesjms/fsw136>
- 843 Stenevik, E. K., & Sundby, S. (2007). Impacts of climate change on commercial fish stocks in  
844 Norwegian waters. *Marine Policy*, 31(1), 19–31.  
845 <https://doi.org/10.1016/j.marpol.2006.05.001>
- 846 Thomas, C. D. (2010). Climate, climate change and range boundaries. *Diversity and Distributions*,  
847 16(3), 488–495. <https://doi.org/10.1111/j.1472-4642.2010.00642.x>

- 848 Thuiller, W., Lavorel, S., & Araújo, M. B. (2005). Niche properties and geographical extent as  
849 predictors of species sensitivity to climate change. *Global Ecology and Biogeography*, 14(4),  
850 347–357. <https://doi.org/10.1111/j.1466-822X.2005.00162.x>
- 851 van der Ploeg, R. R., Böhm, W., & Kirkham, M. B. (1999). *On the Origin of the Theory of Mineral*  
852 *Nutrition of Plants and the Law of the Minimum*. 63(5), 1055–1062.  
853 <https://doi.org/10.2136/sssaj1999.6351055x>
- 854 Vaz, S., Martin, C. S., Eastwood, P. D., Ernande, B., Carpentier, A., Meaden, G. J., & Coppin, F. (2008).  
855 Modelling species distributions using regression quantiles: Modelling species distributions  
856 using RQ. *Journal of Applied Ecology*, 45(1), 204–217. [https://doi.org/10.1111/j.1365-](https://doi.org/10.1111/j.1365-2664.2007.01392.x)  
857 [2664.2007.01392.x](https://doi.org/10.1111/j.1365-2664.2007.01392.x)
- 858 Walsh, S. J. (1996). Life history and ecology of long rough dab *Hippoglossoides platessoides* (F) in the  
859 Barents Sea. *Journal of Sea Research*, 36(3), 285–310. [https://doi.org/10.1016/S1385-](https://doi.org/10.1016/S1385-1101(96)90797-2)  
860 [1101\(96\)90797-2](https://doi.org/10.1016/S1385-1101(96)90797-2)
- 861 Whittaker, R. H. (1967). Gradient Analysis of Vegetation\*. *Biological Reviews*, 42(2), 207–264.  
862 <https://doi.org/10.1111/j.1469-185X.1967.tb01419.x>
- 863 Wyllie-Echeverria, T., & Wooster, W. S. (1998). Year-to-year variations in Bering Sea ice cover and  
864 some consequences for fish distributions. *Fisheries Oceanography*, 7(2), 159–170.  
865 <https://doi.org/10.1046/j.1365-2419.1998.00058.x>

866

## 867 7 TABLES

---

868 No tables in this paper

## 869 8 FIGURES

---

870

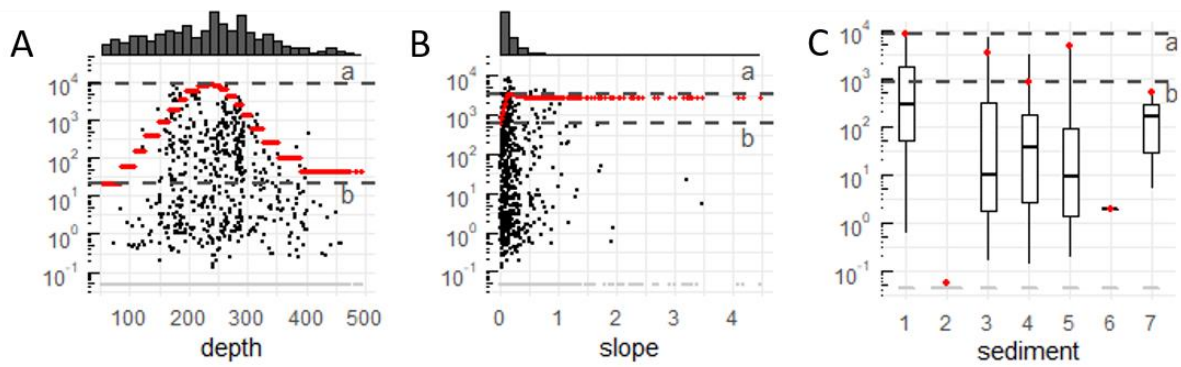

871

872 Figure 1: examples of *Trisopterus esmarkii* modelled log<sub>10</sub> responses to three environmental

873 predictors: depth, slope, and sediment type. A and B: black dotted scatterplot of the log of non-null

874 biomasses of the species in response to the predictor. Red dots indicate modelled log of maximum

875 biomass predictions. On top of the scatterplot, the marginal density shows the distribution of samples

876 conditional to the predictor values. C: Boxplot of response to the sediment. The model prediction is

877 the 99<sup>th</sup> quantile for each sediment class: 1= Coarse sediment, 2= Compacted sediment or sedimentary

878 bedrock, 3= Mixed sediment, 4= Mud, clay and sandy mud, 5= Sand and muddy sand, 6= Sand, gravel

879 and pebbles, 7= Thin or discontinuous sediment on bedrock. All panels: horizontal dashed lines indicate

880 references for the calculation of the contrast: a: max predicted maximum biomass, b: min predicted

881 maximum biomass. Contrast = (a-b)/a.

## Trisopterus esmarkii

A

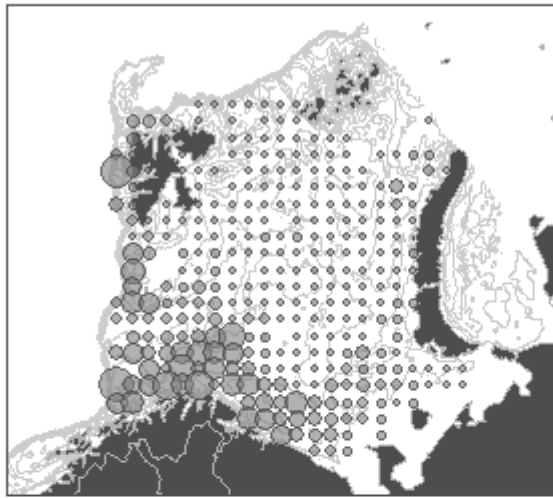

Predicted maximum (99%) biomass (kg/km<sup>2</sup>)

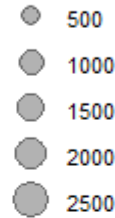

B

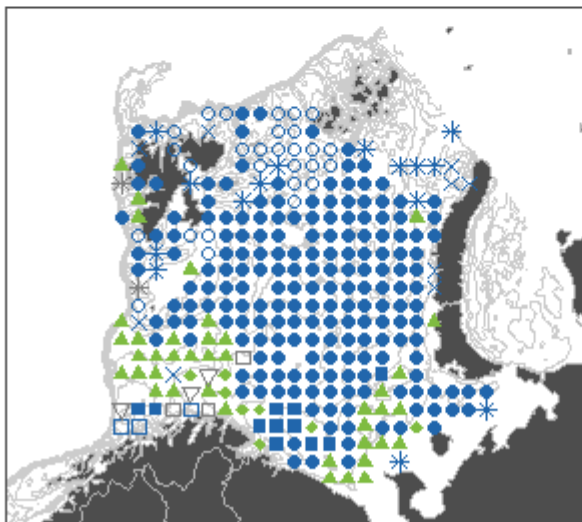

Most limiting factor

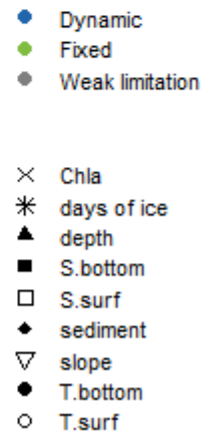

882

883 *Figure 2: Spatial predictions in 2013 of Trisopterus esmarkii A) suitable habitat (maximum biomass)*

884 *and B) most limiting predictor. Color indicates the predictor's category: fixed (sediment, depth,*

885 *slope), dynamic (all the others) or not weakly limiting. (predicted biomass > 25% of the model*

886 *maximum)*

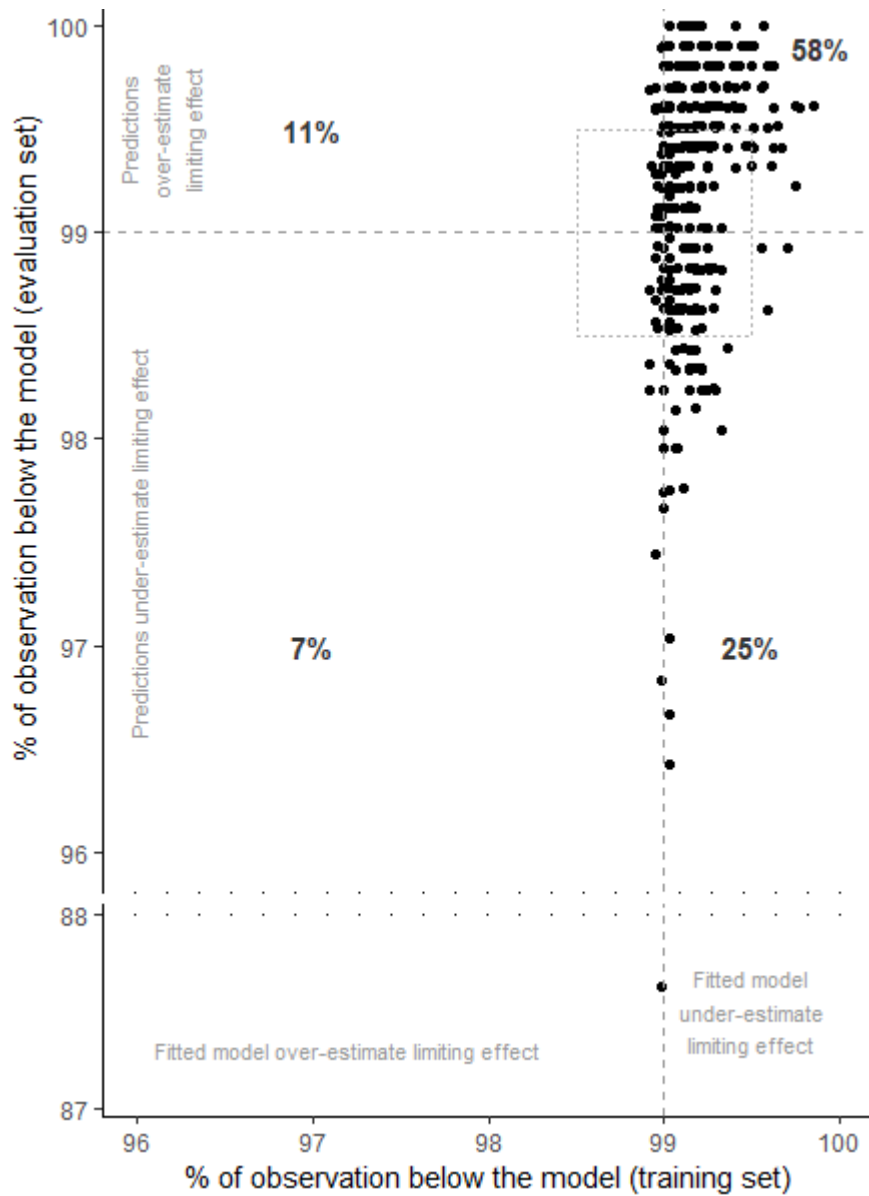

887

888 *Figure 3: scatterplot of the predicted percentile of the observation by the models in the training and*

889 *testing set. The dotted rectangle indicates models that slightly under or overestimate the maximum*

890 *biomass. Outside of that rectangle are the models that strongly under or overestimate the maximum*

891 *biomass.*



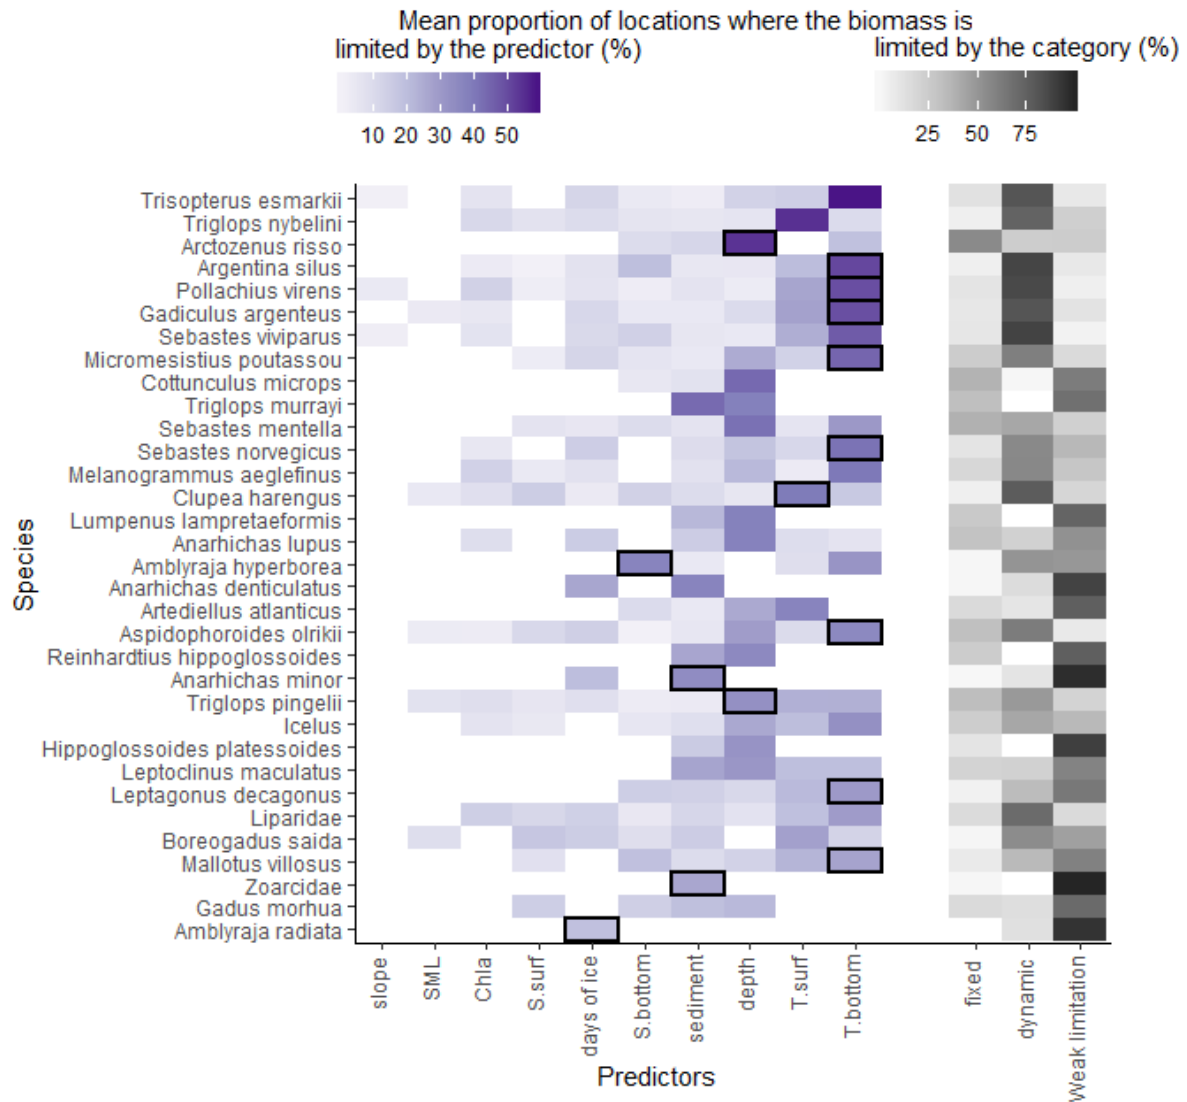

892

893 *Figure 4: Frequency of the limiting effect across space and years. Right panel: for each species, mean*  
 894 *proportion of samples limited by each predictor category: fixed, dynamic, or weakly limiting. Fixed*  
 895 *parameters are slope, depth and sediment. Dynamic predictors are all the others. Predictors are*  
 896 *weakly limiting a sample if the corresponding predicted biomass is >25% of the model maximum. Left*  
 897 *panel: for each species, mean proportion of samples limited by each factor. Only the samples strongly*  
 898 *limited are shown (predicted biomass <25% of the model maximum). Black rectangles identify for*  
 899 *each species the most frequent most limiting predictor, but only if its predictive power is acceptable*  
 900 *(predicted quantile of the testing dataset ranging from 98.5 to 99.5).*

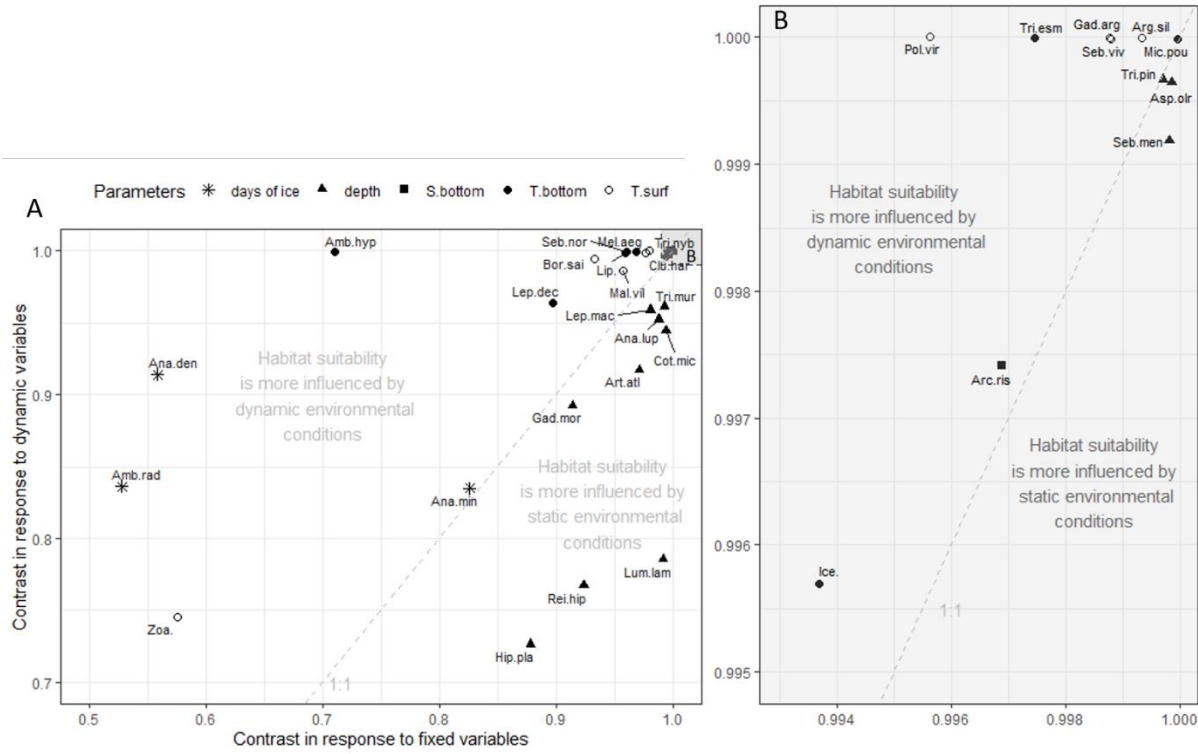

901

902 *Figure 5: Scatterplot of species maximum contrasts in response to fixed versus dynamic variables. The shape of the point indicates which parameter is the*

903 *one with the maximum contrast. The 1:1 line is grey and dashed. B is a zoom in the grey area of A.*

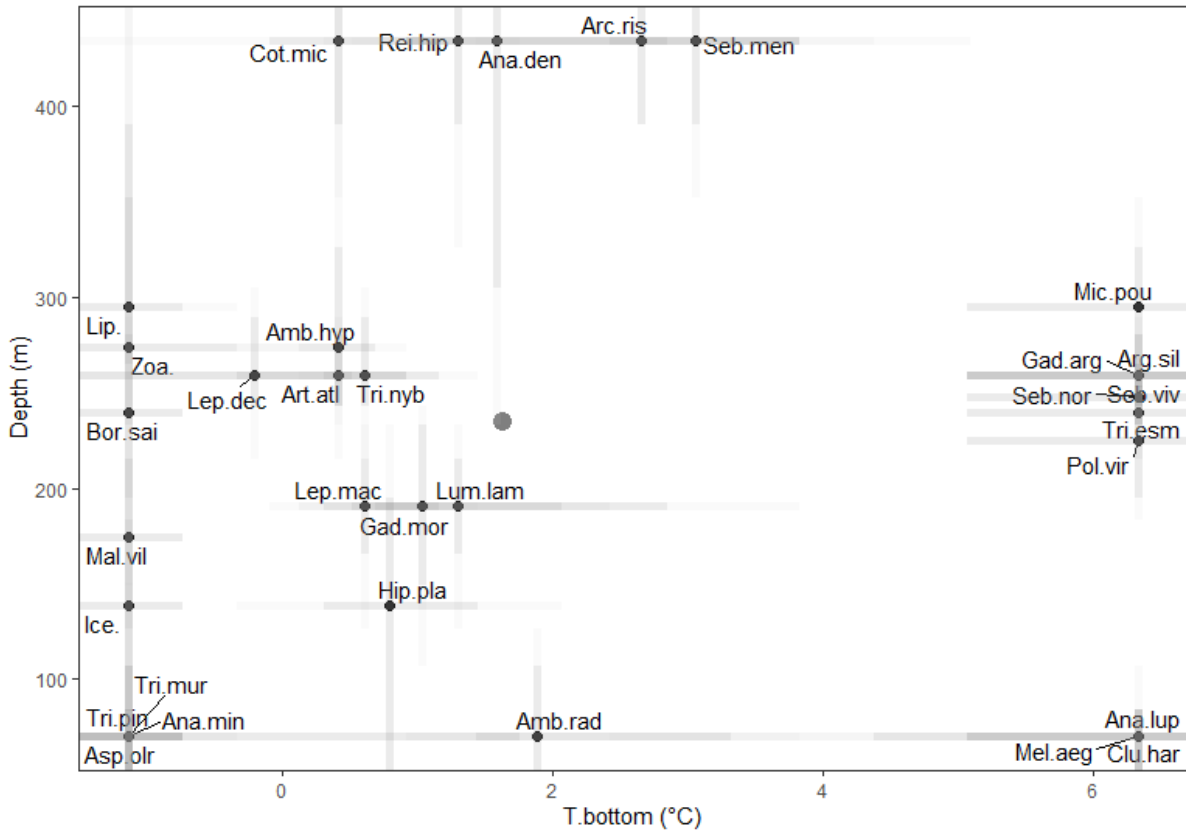

904

905 Figure 6: Bottom temperature - depth habitat preferences of the Barents Sea demersal fish. Dots  
906 indicate the predictor value at which the species predicted biomass is maximum. Grey lines indicate  
907 the width of the species optimum i.e.for which predictors values the predicted biomasses reach 90  
908 (dark grey) and 80% (light grey) of their maximum. Big grey dot indicates the average values of depth  
909 and bottom temperature in the Barents Sea.

910

## 911 9 APPENDICES

912 Supplementary material can be found as PDF on the server

913
